# Supplementary material
Source: PubMed Central journal article supplement (PMC4573264)
Supplement: NIHMS712377-supplement-216_2015_8889_MOESM1_ESM.pdf [file NIHMS712377-supplement-216_2015_8889_MOESM1_ESM.pdf]

## **Analytical and Bioanalytical Chemistry**

### **Electronic Supplementary Material**

#### **Heavy chain single domain antibodies to detect native human soluble epoxide hydrolase**

Yongliang Cui, Dongyang Li, Christophe Morisseau, Jie-Xian Dong, Jun Yang,  
Debin Wan, Martín A. Rossotti, Shirley J. Gee, Gualberto G. González-Sapienza,  
Bruce D. Hammock

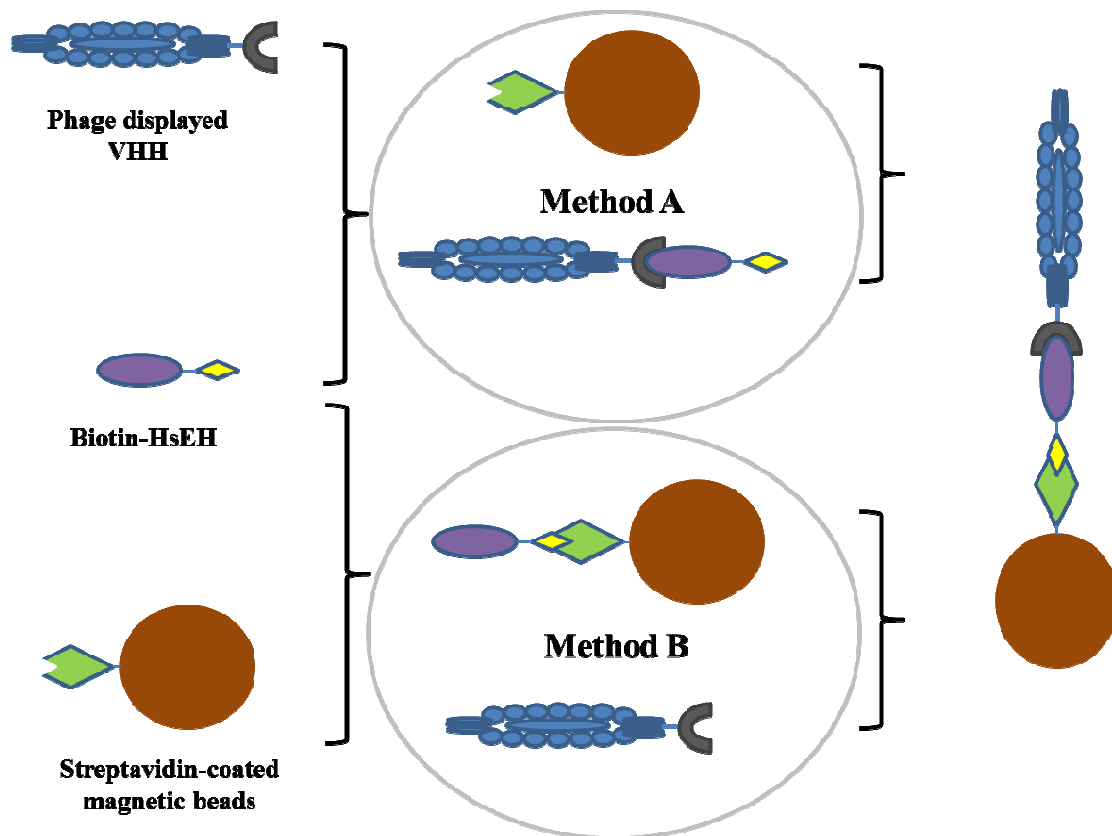

**Fig. S1** Schematic illustration of selection methods **A** and **B**. For Method **A**, biotin-HsEH (10  $\mu$ L, 16  $\mu$ M) was incubated with phage displaying VHH for 1 h at 4  $^{\circ}$ C. Then prewashed streptavidin magnetic beads (10  $\mu$ L) were added and incubated for 15 min at 4 $^{\circ}$ C. For Method **B**, biotin-HsEH preincubated with streptavidin coated magnetic beads (10  $\mu$ L, 16  $\mu$ M) were added to the tube containing phage displaying VHH and incubated for 1 h at 4  $^{\circ}$ C. The tube was then placed on the magnetic particle separator for 15-30 seconds. The supernatant was removed. The pellet was washed with 300  $\mu$ L of PBB five times

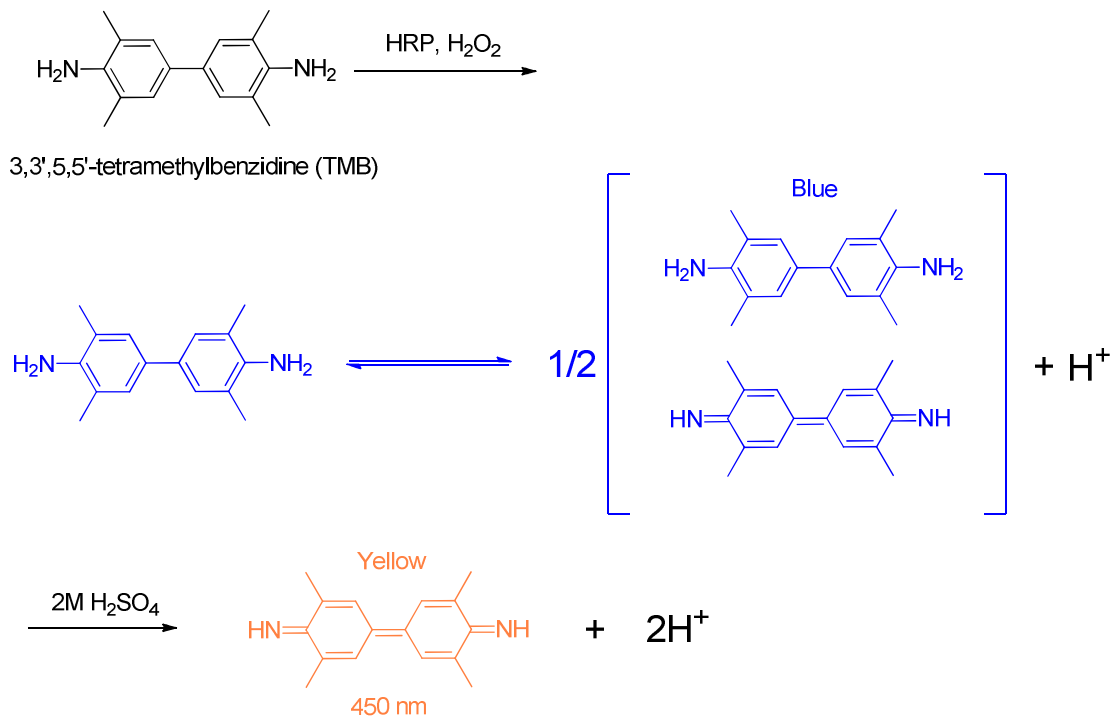

**Fig. S2** The chemistry reaction of the color development.

3,3',5,5'-Tetramethylbenzidine (TMB) acts as a hydrogen donor for the reduction of hydrogen peroxide to water by horseradish peroxidase (HRP). The resulting diimine is blue in color. Addition of sulfuric acid turns the color to yellow and is read at 450 nm

**Table S1** Sequence of primers used to construct the VHH phage library

| Name | Sequence                                                                       |
|------|--------------------------------------------------------------------------------|
| VH1  | CATGCCATGACTCGC <i><u>GGCCCAGGCGGCC</u></i> CATGGCCCAGGTGCAGC<br>TGGTGCAGTCTGG |
| VH3  | CATGCCATGACTCGC <i><u>GGCCCAGGCGGCC</u></i> CATGGCCGAGGTGCAGC<br>TGGTGGAGTCTGG |
| VH4  | CATGCCATGACTCGC <i><u>GGCCCAGGCGGCC</u></i> CATGGCCCAGGTGCAGC<br>TGCAGGAGTCGGG |
| JH   | CCACGATTCT <i><u>GGCCGGCCTGGCCT</u></i> GAGGAGACRGTGACCTGGGT<br>CC             |

*Sfi*I restriction sites are in italic and underlined. Forward primers VH1, VH3 and VH4,  
Reverse primer JH
